# Supplementary material
Source: publisher figshare collection journal article supplement (https://acs.figshare.com/ndownloader/files/7597387)
Supplement: Supplementary file 1 [file 7597387]

# SDA-free hydrothermal synthesis of high-silica ultra-nanosized zeolite Y

*Maeva Borel,<sup>a,b</sup> Mathias Dodin,<sup>a</sup> T. Jean Daou,<sup>b,\*</sup> Nicolas Bats,<sup>a</sup> Bogdan Harbuzaru,<sup>a</sup> and Joël Patarin<sup>b</sup>*

<sup>a</sup>IFP Energies nouvelles, BP3, 69360 Solaize, France

<sup>b</sup>Université de Strasbourg (UNISTRA), Université de Haute Alsace (UHA), CNRS, Axe  
Matériaux à Porosité Contrôlée (MPC), Institut de Science des Matériaux de Mulhouse (IS2M)  
UMR 7361, 68093 Mulhouse, France

\*E-mail: jean.daou@uha.fr Phone: +33 389 33 67 39. Fax: +33 389 33 68 85.

**Table S1.** Products obtained from initial molar gel compositions 31 SiO<sub>2</sub> : 1 Al<sub>2</sub>O<sub>3</sub> : 17 Na<sub>2</sub>O : β H<sub>2</sub>O (β varying between 360 and 615) with an aging time of 20 days at room temperature and a heating step at 60 °C during 16 hours.

| Sample | β   | Zeolite type | X-ray diffraction<br>a <sub>0</sub> <sup>a</sup> (Å) | Si/Al <sup>b</sup> | V <sub>micro</sub> <sup>c</sup><br>(cm <sup>3</sup> /g) | V <sub>tot pore</sub> <sup>d</sup><br>(cm <sup>3</sup> /g) | S <sub>BET</sub> <sup>e</sup><br>(m <sup>2</sup> /g) | Average particle<br>size <sup>f</sup> (nm) |
|--------|-----|--------------|------------------------------------------------------|--------------------|---------------------------------------------------------|------------------------------------------------------------|------------------------------------------------------|--------------------------------------------|
| P      | 360 | Zeolite Y    | 24.7252(15)                                          | 2.12               | 0.21                                                    | 0.80                                                       | 617                                                  | 114±14                                     |
| Q      | 485 | Zeolite Y    | 24.7292(19)                                          | 2.10               | 0.31                                                    | 1.16                                                       | 859                                                  | 171±25                                     |
| R      | 550 | Zeolite Y    | 24.688(3)                                            | 2.35               | 0.04                                                    | 0.90                                                       | 199                                                  | ND <sup>g</sup>                            |
| S      | 615 | Zeolite Y    | 24.692(4)                                            | 2.33               | 0.04                                                    | 0.95                                                       | 182                                                  | ND                                         |

<sup>a</sup> $a_0$ : Lattice parameter

<sup>b</sup>Si/Al ratio obtained by XRD and using the Breck and Flanigen equation:  $((192 \cdot 0.00868)/(a_0 - 24.191)) - 1$

<sup>c</sup> $V_{\text{micro}}$ : Micropore volume

<sup>d</sup> $V_{\text{tot pore}}$ : Total pore volume

<sup>e</sup> $S_{\text{BET}}$ : Specific surface area

<sup>f</sup>Average particle size determined from transmission electron microscopy images

<sup>g</sup>ND: Not determined

## XRD patterns

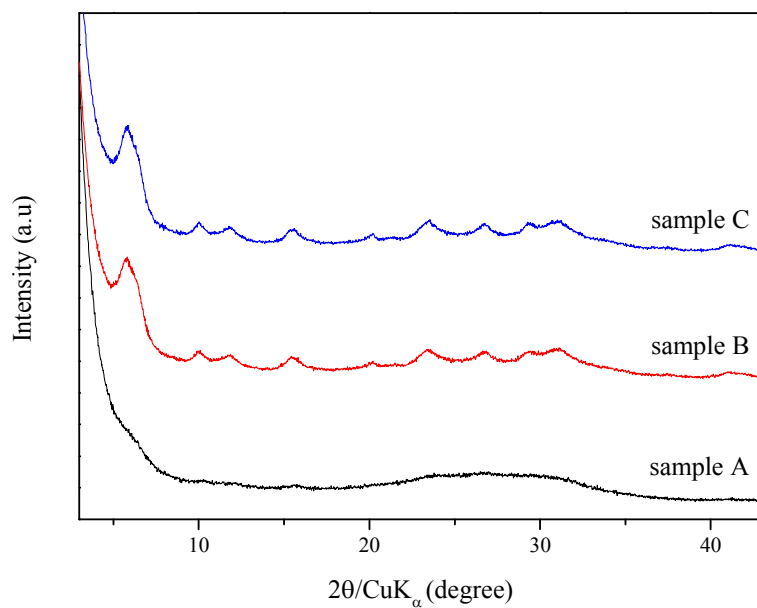

**Figure S1.** XRD patterns for samples obtained from the initial molar gel composition 15 SiO<sub>2</sub> : 1 Al<sub>2</sub>O<sub>3</sub> : 17 Na<sub>2</sub>O : 360 H<sub>2</sub>O with an aging time of 7 (sample A), 10 (sample B) and 13 (sample C) days and with no heating step.

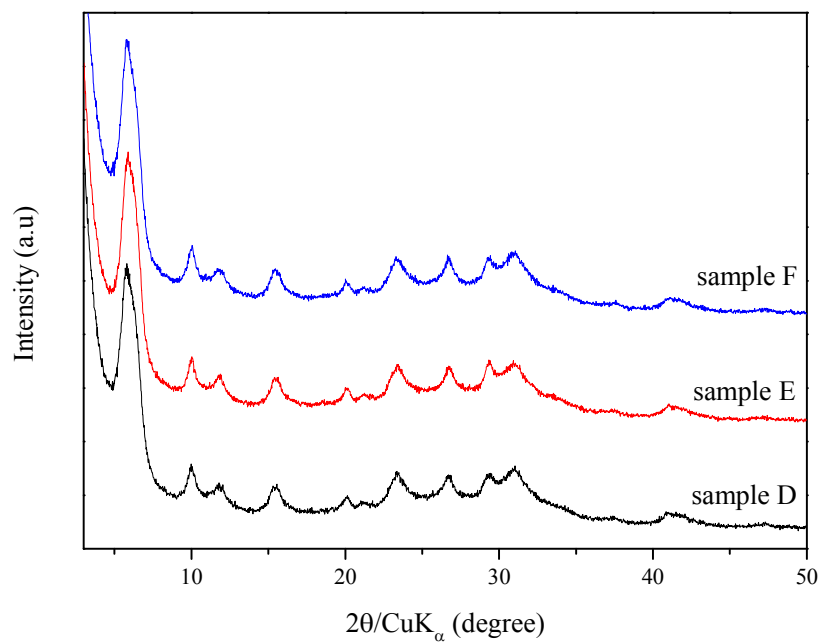

**Figure S2.** XRD patterns for samples obtained from the initial molar gel composition 15  $\text{SiO}_2$  : 1  $\text{Al}_2\text{O}_3$  : 17  $\text{Na}_2\text{O}$  : 360  $\text{H}_2\text{O}$  with an aging time of 7 (sample D), 10 (sample E) and 13 (sample F) days and with a heating step at 60 °C during 16 hours.

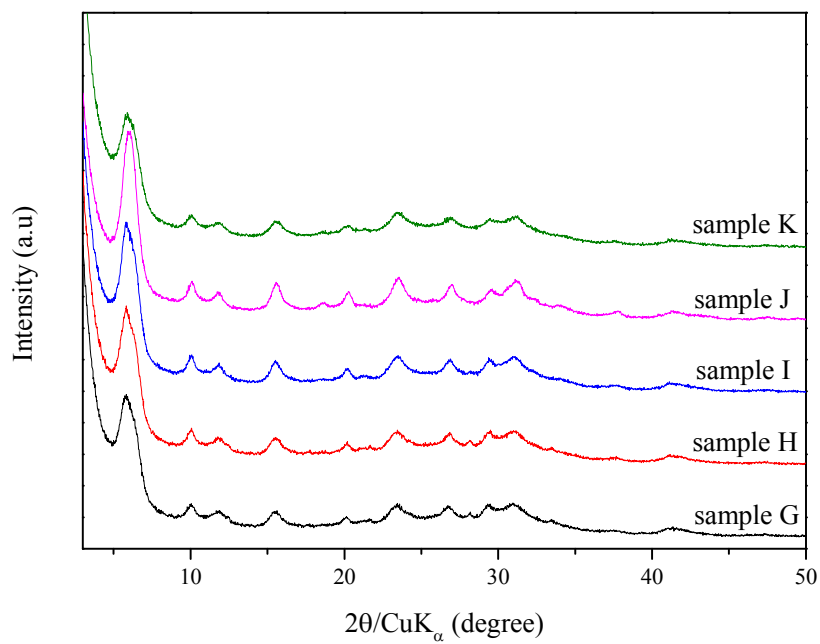

**Figure S3.** XRD patterns for samples obtained from final molar gel compositions  $\alpha$   $\text{SiO}_2$  : 1  $\text{Al}_2\text{O}_3$  : 17  $\text{Na}_2\text{O}$  : 360  $\text{H}_2\text{O}$  ( $\alpha$  = 21 (sample G), 26 (sample H), 31 (sample I), 36 (sample J), 41 (sample K)) with an aging time of 13 days and a heating step at 60 °C during 16 hours.

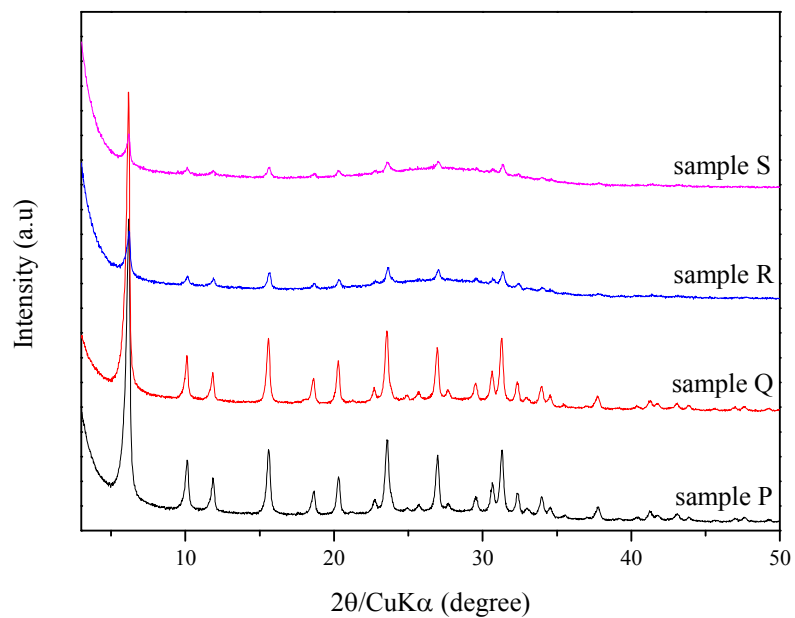

**Figure S4.** XRD patterns for samples obtained from initial molar gel compositions 31 SiO<sub>2</sub> : 1 Al<sub>2</sub>O<sub>3</sub> : 17 Na<sub>2</sub>O : β H<sub>2</sub>O (β = 360 (sample P), 485 (sample Q), 550 (sample R), 615 (sample S)) with an aging time of 20 days and a heating step at 60 °C during 16 hours.

#### **Nitrogen adsorption curves**

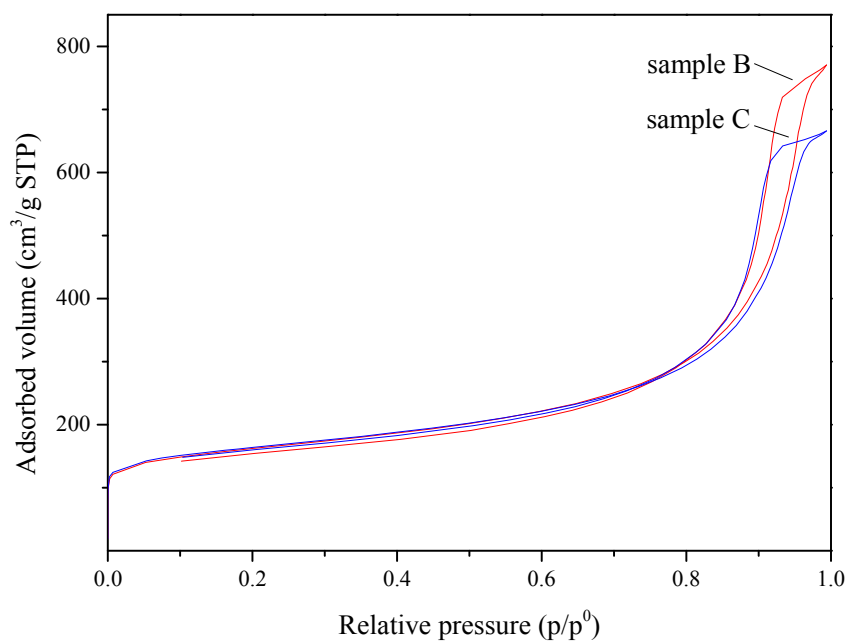

**Figure S5.** Nitrogen adsorption-desorption isotherms at -196 °C for samples obtained from the initial molar gel composition 15 SiO<sub>2</sub> : 1 Al<sub>2</sub>O<sub>3</sub> : 17 Na<sub>2</sub>O : 360 H<sub>2</sub>O with an aging time of 10 (sample B) and 13 (sample C) days and with no heating step.

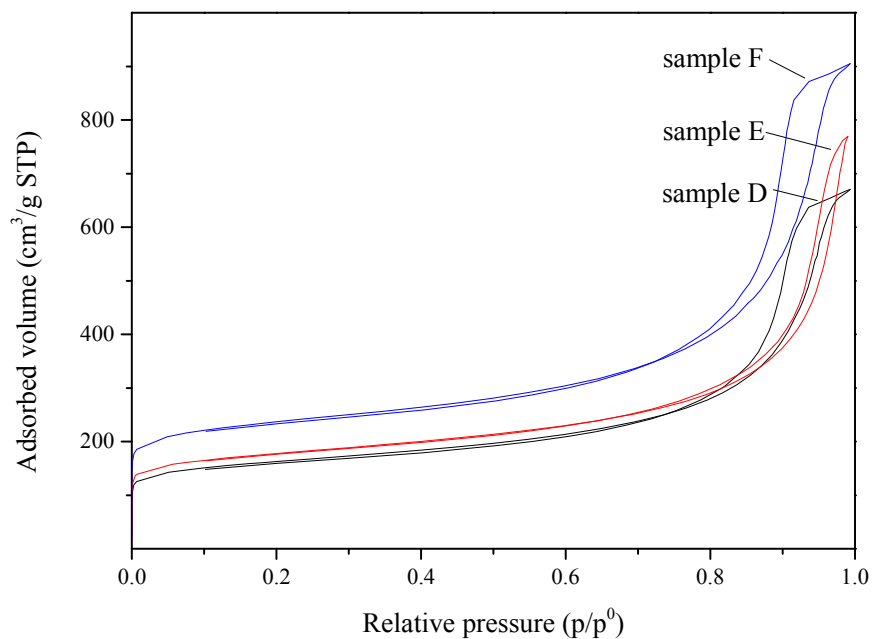

**Figure S6.** Nitrogen adsorption-desorption isotherms at -196 °C for samples obtained from the initial molar gel composition 15 SiO<sub>2</sub> : 1 Al<sub>2</sub>O<sub>3</sub> : 17 Na<sub>2</sub>O : 360 H<sub>2</sub>O with an aging time of 7 (sample D), 10 (sample E) and 13 (sample F) days and with a heating step at 60 °C during 16 hours.

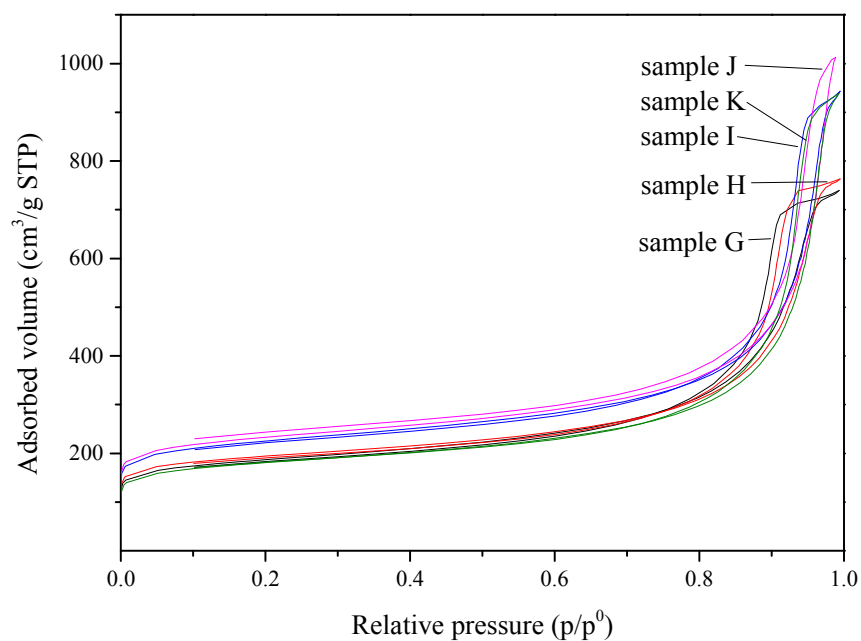

**Figure S7.** Nitrogen adsorption-desorption isotherms at -196 °C for samples obtained from final molar gel compositions  $\alpha$  SiO<sub>2</sub> : 1 Al<sub>2</sub>O<sub>3</sub> : 17 Na<sub>2</sub>O : 360 H<sub>2</sub>O ( $\alpha$  = 21 (sample G), 26 (sample H), 31 (sample I), 36 (sample J), 41 (sample K)) with an aging time of 13 days and a heating step at 60 °C during 16 hours.

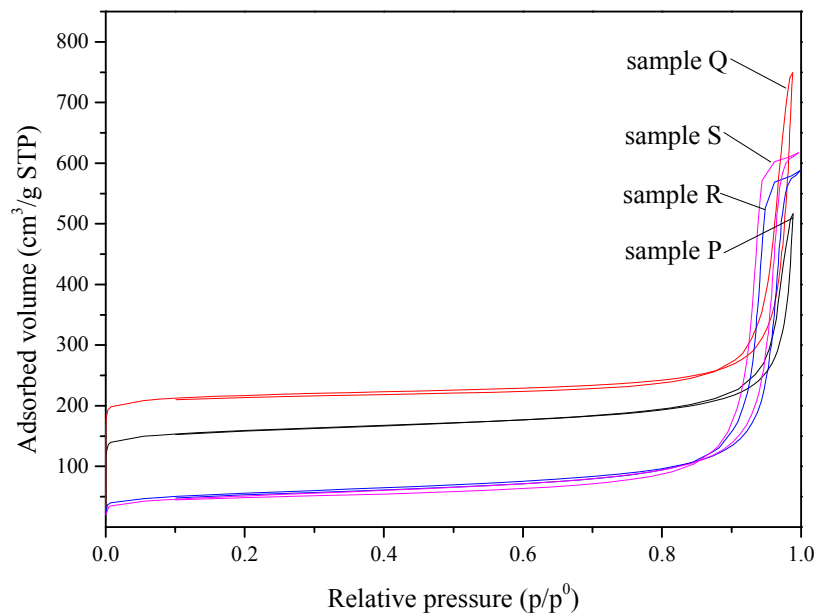

**Figure S8.** Nitrogen adsorption-desorption isotherms at -196 °C for samples obtained from initial molar gel compositions 31 SiO<sub>2</sub> : 1 Al<sub>2</sub>O<sub>3</sub> : 17 Na<sub>2</sub>O :  $\beta$  H<sub>2</sub>O ( $\beta$  = 360 (sample P), 485 (sample Q), 550 (sample R), 615 (sample S)) with an aging time of 20 days and a heating step at 60 °C during 16 hours.

**Si/Al framework ratio and silica content in the gel**

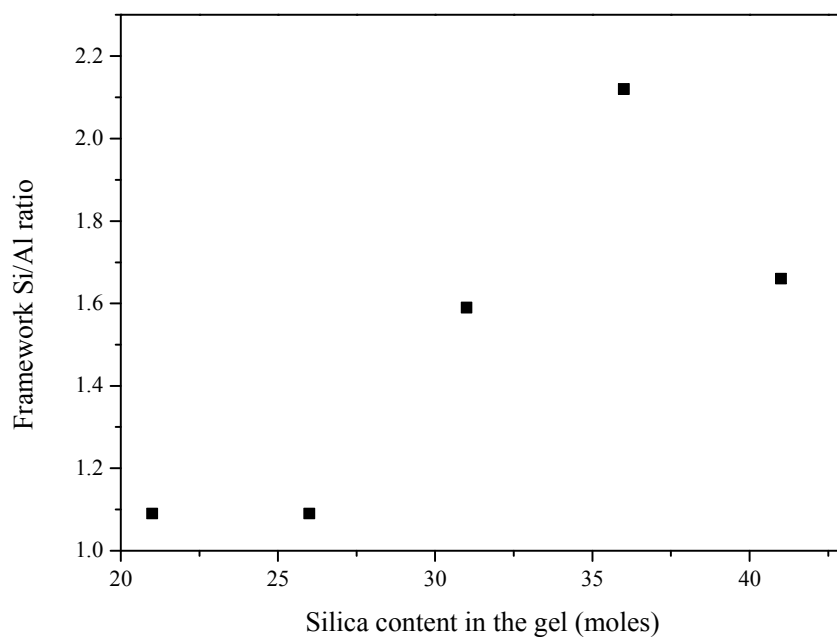

**Figure S9.** Evolution of the Si/Al framework ratio for samples obtained from final molar gel compositions  $\alpha$   $\text{SiO}_2$  : 1  $\text{Al}_2\text{O}_3$  : 17  $\text{Na}_2\text{O}$  : 360  $\text{H}_2\text{O}$  ( $\alpha = 21$  (sample G), 26 (sample H), 31 (sample I), 36 (sample J), 41 (sample K)) with an aging time of 13 days and a heating step at 60 °C during 16 hours.

#### **Micropore volume and silica content in the gel**

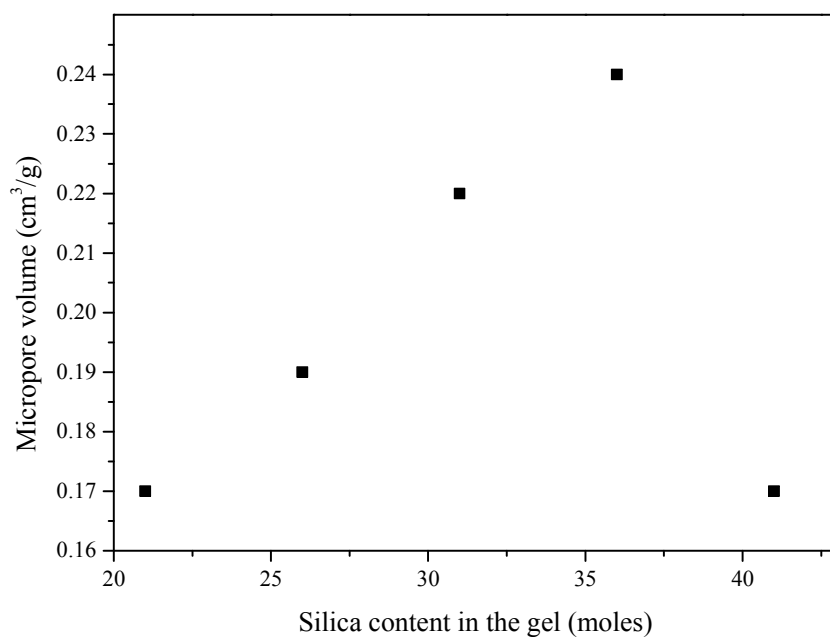

**Figure S10.** Evolution of the micropore volume for samples obtained from final molar gel compositions  $\alpha$   $\text{SiO}_2$  : 1  $\text{Al}_2\text{O}_3$  : 17  $\text{Na}_2\text{O}$  : 360  $\text{H}_2\text{O}$  ( $\alpha = 21$  (sample G), 26 (sample H), 31 (sample I), 36 (sample J), 41 (sample K)) with an aging time of 13 days and a heating step at 60 °C during 16 hours.

### NMR spectra

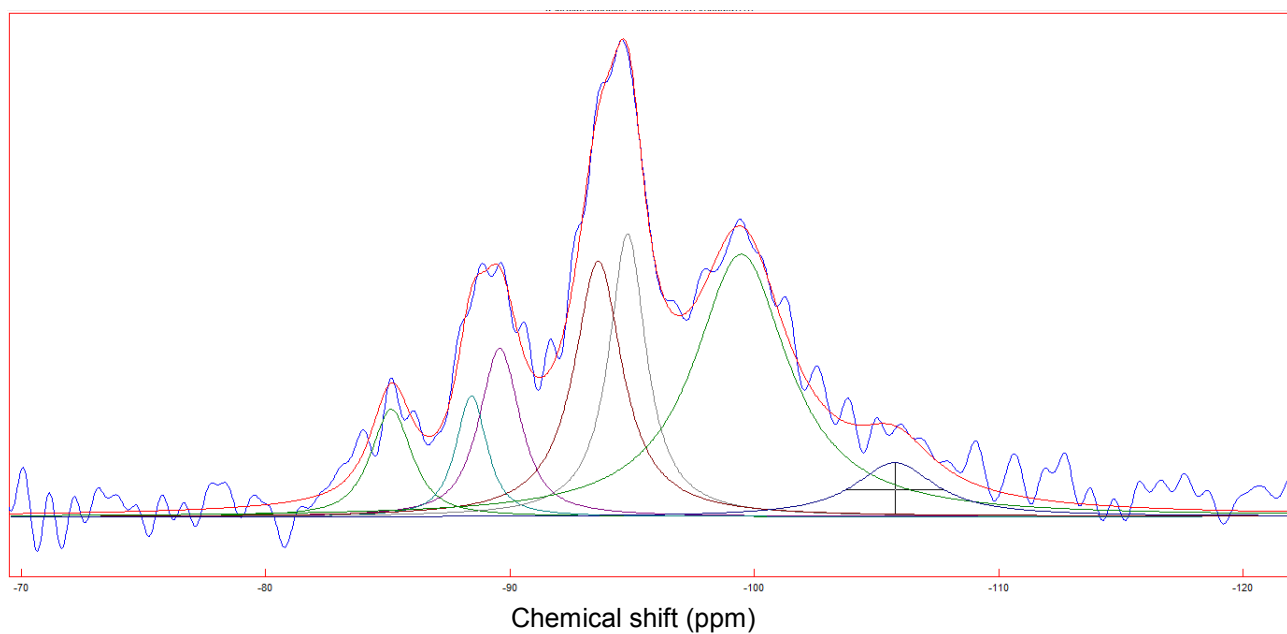

**Figure S11.**  $^{29}\text{Si}$  solid-state MAS NMR spectrum for the sample obtained from the final molar gel composition 36  $\text{SiO}_2$  : 1  $\text{Al}_2\text{O}_3$  : 17  $\text{Na}_2\text{O}$  : 360  $\text{H}_2\text{O}$  with an aging time of 13 days and a heating step at 70 °C (sample N) during 16 hours.

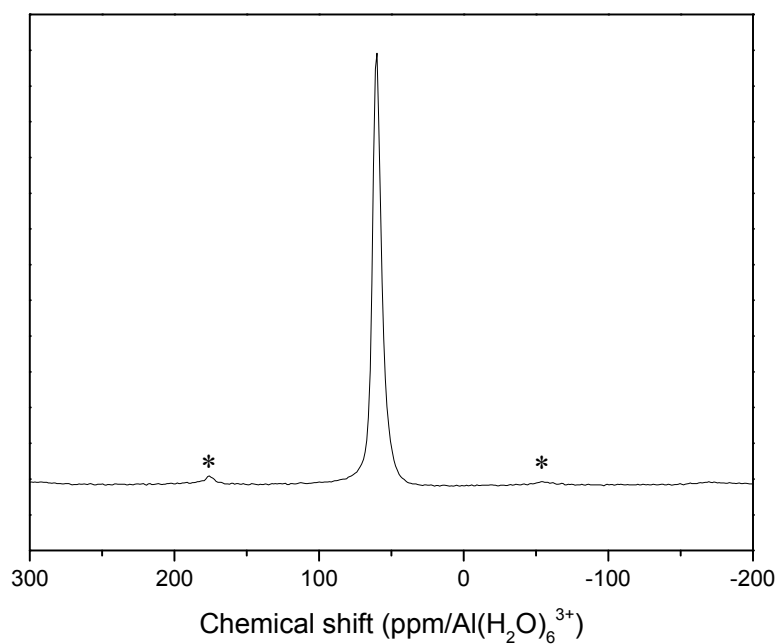

**Figure S12.**  $^{27}\text{Al}$  solid-state MAS NMR spectrum for the sample obtained from the final molar gel composition  $36 \text{ SiO}_2 : 1 \text{ Al}_2\text{O}_3 : 17 \text{ Na}_2\text{O} : 360 \text{ H}_2\text{O}$  with an aging time of 13 days and a heating step at  $70^\circ\text{C}$  (sample N) during 16 hours. The weak peaks indicated by an asterisk are spinning side bands.

### Size distributions and transmission electron microscopy images

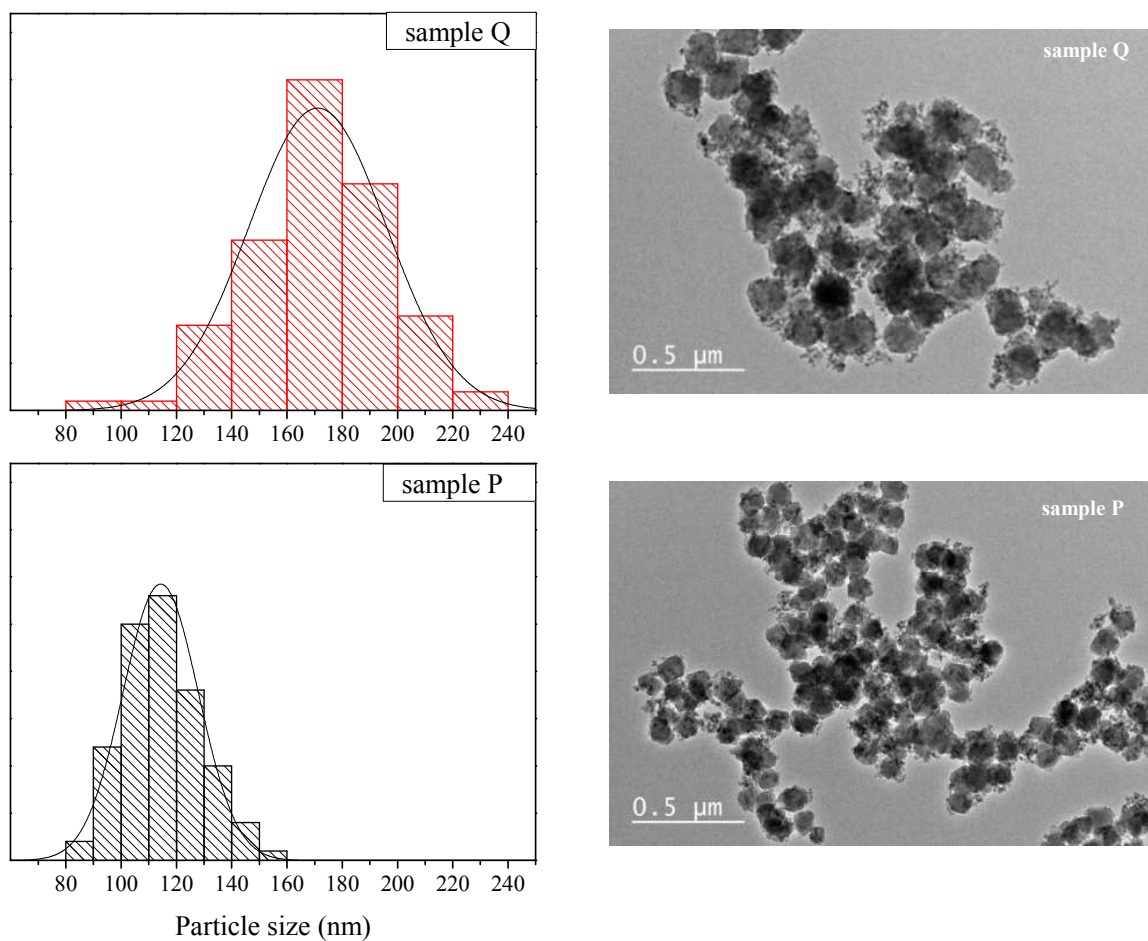

**Figure S13.** Size distributions (left) and transmission electron microscopy images (right) for samples obtained from initial molar gel compositions  $31 \text{ SiO}_2 : 1 \text{ Al}_2\text{O}_3 : 17 \text{ Na}_2\text{O} : \beta \text{ H}_2\text{O}$  ( $\beta = 360$  (sample P),  $485$  (sample Q)) with an aging time of 20 days and a heating step at  $60^\circ\text{C}$  during 16 hours.
